# Supplementary material for: Predicting lake dissolved organic carbon at a global scale
Source: PubMed Central journal article supplement (PMC7242472; doi:10.1038/s41598-020-65010-3), 2020-05-21
Supplement: 41598_2020_65010_MOESM1_ESM.pdf [file 41598_2020_65010_MOESM1_ESM.pdf]

SUPPORTING INFORMATION FOR:

Predicting lake dissolved organic carbon at a global scale

Toming, Kaire\* ; Kotta, Jonne; Uuemaa, Evelyn, Sobek, Sebastian; Kutser, Tiit; Tranvik, Lars J.

\* Correspondence and requests for materials should be addressed to K. Toming (email:

kaire.toming.001@ut.ee)

This PDF includes:

Supporting Tables 1 – 3

**Table 1.** Predicted volume weighted average DOC concentrations ( $\text{mg L}^{-1}$ ) and total DOC pools (Tg) of global lakes by classes of morphometry (area, volume, depth, shoreline length and development) and residence time.

| Lake area ( $\text{km}^2$ )                         | N         | DOC ( $\text{mg L}^{-1}$ ) |        |      | DOC pool (Tg) |
|-----------------------------------------------------|-----------|----------------------------|--------|------|---------------|
|                                                     |           | Mean                       | Min    | Max  |               |
| = 371,000 (Caspian Sea)                             | 1         | 5.57                       | -      | -    | 421           |
| >10,000 and $\leq$ 100,000                          | 17        | 1.96                       | 1.0000 | 8.04 | 162           |
| >1,000 and $\leq$ 10,000                            | 160       | 4.58                       | 2.1620 | 11.9 | 56.1          |
| >100 and $\leq$ 1,000                               | 1,526     | 4.15                       | 0.0769 | 12.8 | 34.7          |
| >10 and $\leq$ 100                                  | 14,963    | 4.88                       | 0.0003 | 18.5 | 24.2          |
| >1 and $\leq$ 10                                    | 166,590   | 7.03                       | 0.0022 | 21.8 | 19.0          |
| $\geq$ 0.1 and $\leq$ 1                             | 1,244,112 | 8.36                       | 0.0002 | 27.0 | 11.0          |
| Lake volume ( $\text{km}^3$ )                       | N         | DOC ( $\text{mg L}^{-1}$ ) |        |      | DOC pool (Tg) |
|                                                     |           | Mean                       | Min    | Max  |               |
| = 78,200 (Caspian Sea)                              | 1         | 5.57                       | -      | -    | 421           |
| >10,000 and $\leq$ 25,000                           | 3         | 1.70                       | 1.2000 | 2.42 | 92.0          |
| >1,000 and $\leq$ 10,000                            | 9         | 2.30                       | 1.0000 | 6.49 | 64.1          |
| >100 and $\leq$ 1,000                               | 33        | 4.54                       | 0.7184 | 8.15 | 40.6          |
| >10 and $\leq$ 100                                  | 296       | 4.60                       | 0.0293 | 11.9 | 36.1          |
| >1 and $\leq$ 10                                    | 2,087     | 4.45                       | 0.0003 | 12.8 | 26.0          |
| >0.1 and $\leq$ 1                                   | 11,377    | 5.54                       | 0.2400 | 17.3 | 17.7          |
| $\leq$ 0.1                                          | 1,413,525 | 7.98                       | 0.0002 | 27.0 | 31.0          |
| Lake mean depth (m)                                 | N         | DOC ( $\text{mg L}^{-1}$ ) |        |      | DOC pool (Tg) |
|                                                     |           | Mean                       | Min    | Max  |               |
| = 758 (Lake Baikal)                                 | 1         | 1.22                       | -      | -    | 28.7          |
| >100 and $\leq$ 600 (with Caspian Sea)              | 241       | 4.22                       | 0.0293 | 9.43 | 513           |
| >100 and $\leq$ 600 (without Caspian Sea)           | 240       | 2.00                       | 0.0293 | 9.43 | 91.4          |
| >10 and $\leq$ 100                                  | 35,219    | 3.80                       | 0.0003 | 15.4 | 135           |
| >1 and $\leq$ 10                                    | 136,0534  | 7.74                       | 0.0002 | 27.0 | 42.0          |
| $\leq$ 1                                            | 31,318    | 6.81                       | 0.7856 | 23.1 | 0.40          |
| Shoreline length (km)                               | N         | DOC ( $\text{mg L}^{-1}$ ) |        |      | DOC pool (Tg) |
|                                                     |           | Mean                       | Min    | Max  |               |
| = 15,829 (Caspian Sea)                              | 1         | 5.57                       | -      | -    | 421           |
| >1,000 and $\leq$ 10,000                            | 176       | 2.15                       | 1.0000 | 11.9 | 188           |
| >100 and $\leq$ 1,000                               | 3,900     | 4.24                       | 0.0066 | 17.3 | 71.1          |
| >10 and $\leq$ 100                                  | 100,098   | 5.45                       | 0.0003 | 21.5 | 32.0          |
| >2 and $\leq$ 10                                    | 922,122   | 8.15                       | 0.0002 | 27.0 | 15.0          |
| $\leq$ 2                                            | 401,017   | 8.00                       | 0.0037 | 25.6 | 2.00          |
| Shoreline complexity                                | N         | DOC ( $\text{mg L}^{-1}$ ) |        |      | DOC pool (Tg) |
|                                                     |           | Mean                       | Min    | Max  |               |
| >25 and $\leq$ 55                                   | 24        | 6.45                       | 3.81   | 9.41 | 5.86          |
| >10 and $\leq$ 25                                   | 730       | 4.27                       | 0.0293 | 14.4 | 39.5          |
| >5 and $\leq$ 10 (with Caspian Sea)                 | 7,970     | 4.84                       | 0.0092 | 19.3 | 488           |
| >5 and $\leq$ 10 (without Caspian Sea)              | 7,969     | 2.65                       | 0.0092 | 19.3 | 66.9          |
| >2 and $\leq$ 5                                     | 293,284   | 2.25                       | 0.0003 | 23.0 | 158           |
| $\leq$ 2                                            | 112,5307  | 5.66                       | 0.0002 | 27.0 | 37.0          |
| Residence time (days)                               | N         | DOC ( $\text{mg L}^{-1}$ ) |        |      | DOC pool (Tg) |
|                                                     |           | Mean                       | Min    | Max  |               |
| >100,000 and $\leq$ 3,000,000 (with Caspian Sea)    | 557       | 4.14                       | 0.2209 | 15.2 | 505           |
| >100,000 and $\leq$ 3,000,000 (without Caspian Sea) | 556       | 1.81                       | 0.2209 | 15.2 | 83.4          |
| >10,000 and $\leq$ 100,000                          | 42,195    | 1.95                       | 0.0567 | 19.0 | 67.7          |
| >1,000 and $\leq$ 10,000                            | 436,207   | 4.56                       | 0.0254 | 20.8 | 84.0          |
| >100 and $\leq$ 1,000                               | 573,085   | 5.41                       | 0.0003 | 26.0 | 47.0          |
| >10 and $\leq$ 100                                  | 252,824   | 6.57                       | 0.0022 | 27.0 | 12.0          |
| $\leq$ 10                                           | 122,443   | 5.41                       | 0.0002 | 21.3 | 14.0          |

**Table 2.** Predicted volume weighted average DOC concentrations ( $\text{mg L}^{-1}$ ) and total DOC pool (Tg) of global lakes by meteorological and hydrological characteristics (air temperature, precipitation, solar radiation, discharge).

| Air temperature ( $^{\circ}\text{C}$ )                  | N         | DOC ( $\text{mg L}^{-1}$ ) |        |      | DOC pool (Tg) |
|---------------------------------------------------------|-----------|----------------------------|--------|------|---------------|
|                                                         |           | Mean                       | Min    | Max  |               |
| >20 and $\leq$ 30                                       | 87,011    | 2.23                       | 0.0002 | 18.0 | 75.1          |
| >10 and $\leq$ 20 (with Caspian Sea)                    | 63,748    | 5.46                       | 0.0022 | 23.8 | 443           |
| >10 and $\leq$ 20 (without Caspian Sea)                 | 63,747    | 3.87                       | 0.0022 | 23.8 | 21.2          |
| >0 and $\leq$ 10                                        | 269,917   | 2.83                       | 0.0007 | 27.0 | 100           |
| >-10 and $\leq$ 0                                       | 638,462   | 2.54                       | 0.0037 | 25.2 | 88.0          |
| $\leq$ -10                                              | 368,116   | 7.69                       | 0.0103 | 24.7 | 23.0          |
| Precipitation (mm)                                      | N         | DOC ( $\text{mg L}^{-1}$ ) |        |      | DOC pool (Tg) |
|                                                         |           | Mean                       | Min    | Max  |               |
| >1,000 and $\leq$ 3,500                                 | 172,132   | 1.95                       | 0.0022 | 18.7 | 31.9          |
| >500 and $\leq$ 1,000                                   | 452,006   | 2.84                       | 0.0002 | 27.0 | 153           |
| >250 and $\leq$ 500 (with Caspian Sea)                  | 491,047   | 4.61                       | 0.0003 | 24.7 | 505           |
| >250 and $\leq$ 500 (without Caspian Sea)               | 491,046   | 2.47                       | 0.0003 | 24.7 | 84            |
| >100 and $\leq$ 250                                     | 298,732   | 4.80                       | 0.0037 | 24.3 | 36.0          |
| $\leq$ 100                                              | 10,066    | 5.17                       | 0.0670 | 19.9 | 2.90          |
| Solar radiation ( $\text{kJ m}^{-2} \text{ day}^{-1}$ ) | N         | DOC ( $\text{mg L}^{-1}$ ) |        |      | DOC pool (Tg) |
|                                                         |           | Mean                       | Min    | Max  |               |
| >15,000 and $\leq$ 20,000                               | 106,917   | 2.23                       | 0.0003 | 18.6 | 87.1          |
| >8,000 and $\leq$ 15,000 (with Caspian Sea)             | 1,218,200 | 4.31                       | 0.0002 | 27.0 | 635           |
| >8,000 and $\leq$ 15,000 (without Caspian Sea)          | 1,218,199 | 2.98                       | 0.0002 | 27.0 | 213           |
| $\leq$ 8,000                                            | 84,002    | 3.98                       | 0.0037 | 16.0 | 2.50          |
| Discharge ( $\text{m}^3 \text{ s}^{-1}$ )               | N         | DOC ( $\text{mg L}^{-1}$ ) |        |      | DOC pool (Tg) |
|                                                         |           | Mean                       | Min    | Max  |               |
| >1,000 and $\leq$ 15,000 (with Caspian Sea)             | 1,183     | 3.73                       | 0.0002 | 14.5 | 584           |
| >1,000 and $\leq$ 15,000 (without Caspian Sea)          | 1,182     | 2.01                       | 0.0100 | 14.5 | 163           |
| >100 and $\leq$ 1,000                                   | 6,384     | 4.16                       | 0.0003 | 16.2 | 48.3          |
| >10 and $\leq$ 100                                      | 24,997    | 3.62                       | 0.0007 | 18.4 | 34.9          |
| >1 and $\leq$ 10                                        | 91,012    | 5.63                       | 0.0073 | 20.4 | 20.5          |
| $\leq$ 1                                                | 1,303,705 | 6.68                       | 0.0037 | 27.0 | 41.0          |

**Table 3.** Predicted volume weighted average DOC concentrations ( $\text{mg L}^{-1}$ ) and total DOC pools (Tg) of global lakes by catchment characteristics (elevation, slope, watershed area, watershed area/lake volume ratio).

| Elevation (m)                                       | N         | DOC ( $\text{mg L}^{-1}$ ) |        |      | DOC pool (Tg) |
|-----------------------------------------------------|-----------|----------------------------|--------|------|---------------|
|                                                     |           | Mean                       | Min    | Max  |               |
| >1,000 and $\leq$ 6,000                             | 37,946    | 2.32                       | 0.0066 | 12.5 | 20.8          |
| >100 and $\leq$ 1,000                               | 925,316   | 2.36                       | 0.0002 | 24.0 | 216           |
| >10 and $\leq$ 100                                  | 360,679   | 5.77                       | 0.4641 | 27.0 | 41.0          |
| >1 and $\leq$ 10                                    | 74,537    | 6.76                       | 0.1058 | 23.4 | 6.90          |
| $\leq$ 1 (with Caspian Sea)                         | 28,835    | 5.60                       | 0.6890 | 23.3 | 444           |
| $\leq$ 1 (without Caspian Sea)                      | 28,834    | 6.14                       | 0.6890 | 23.3 | 22.7          |
| Slope (degrees)                                     | N         | DOC ( $\text{mg L}^{-1}$ ) |        |      | DOC pool (Tg) |
|                                                     |           | Mean                       | Min    | Max  |               |
| >30 and $\leq$ 60                                   | 591       | 3.07                       | 0.1596 | 11.9 | 0.02          |
| >10 and $\leq$ 30                                   | 47,771    | 2.76                       | 0.0002 | 19.3 | 7.50          |
| >1 and $\leq$ 10                                    | 1,038,226 | 5.52                       | 0.0066 | 27.0 | 64.0          |
| $\leq$ 1 (with Caspian Sea)                         | 340,726   | 3.79                       | 0.7856 | 24.2 | 658           |
| $\leq$ 1 (without Caspian Sea)                      | 340,725   | 2.41                       | 0.7856 | 24.2 | 237           |
| Watershed area ( $\text{km}^2$ )                    | N         | DOC ( $\text{mg L}^{-1}$ ) |        |      | DOC pool (Tg) |
|                                                     |           | Mean                       | Min    | Max  |               |
| >100,000 and $\leq$ 3,000,000 (with Caspian Sea)    | 1,368     | 3.71                       | 0.0002 | 14.5 | 591           |
| >100,000 and $\leq$ 3,000,000 (without Caspian Sea) | 1,367     | 2.02                       | 0.0002 | 14.5 | 169           |
| >10,000 and $\leq$ 100,000                          | 7,464     | 4.51                       | 0.0003 | 17.1 | 59.3          |
| >1,000 and $\leq$ 10,000                            | 28,238    | 3.92                       | 0.0007 | 18.0 | 32.4          |
| >100 and $\leq$ 1,000                               | 100,909   | 5.64                       | 0.0140 | 21.1 | 20.4          |
| $\leq$ 100                                          | 1,289,330 | 3.07                       | 0.0037 | 27.0 | 26.0          |
| Watershed area/ lake volume                         | N         | DOC ( $\text{mg L}^{-1}$ ) |        |      | DOC pool (Tg) |
|                                                     |           | Mean                       | Min    | Max  |               |
| > 100                                               | 114,101   | 6.68                       | 0.0002 | 24.0 | 2.00          |
| >10 and $\leq$ 100                                  | 281,016   | 6.66                       | 0.0022 | 27.0 | 18.0          |
| >1 and $\leq$ 10                                    | 666,582   | 5.79                       | 0.0003 | 25.1 | 54.0          |
| $\leq$ 1 (with Caspian)                             | 365,610   | 3.73                       | 0.0037 | 16.5 | 655           |
| $\leq$ 1 (without Caspian)                          | 365,609   | 2.34                       | 0.0037 | 16.5 | 233           |
